# Supplementary material for: N-Bromosuccinimide as a p-type dopant for a Spiro-OMeTAD hole transport material to enhance the performance of perovskite solar cells
Source: Royal Society of Chemistry journal article supplement (doi:10.1039/d1se00043h), 2021-01-01
Supplement: d1se00043h1.pdf [file d1se00043h1.pdf]

# **N-Bromosuccinimide as a P-type Dopant for Spiro-OMeTAD Hole Transport Material to Enhance Performance of Perovskite Solar Cells**

*Siqi Pan<sup>a</sup>, Xichuan Yang<sup>\*a</sup>, Bin Cai<sup>a</sup>, Kaiyuan Yang<sup>a</sup>, Mingyao Ge<sup>a</sup>, Tian Zhang<sup>a</sup>, Haiyang Cui<sup>a</sup>, Licheng Sun<sup>a,b</sup> and Wenxi Ji<sup>c</sup>*

a Institute of Artificial Photosynthesis, State Key Laboratory of Fine Chemicals, DUT–KTH Joint Education and Research Centre on Molecular Devices, Dalian University of Technology (DUT), 2 Linggong Rd., 116024 Dalian, China.

b Department of Chemistry, KTH Royal Institute of Technology, SE-10044 Stockholm, Sweden.

c Beijing Research Institute of Chemical Industry (BRICI), Sinopec, No. 14, Beisanhuan Donglu, Chao Yang District, Beijing 100013, China.

## **Corresponding Author**

\*E-mail address: [yangxc@dlut.edu.cn](mailto:yangxc@dlut.edu.cn)

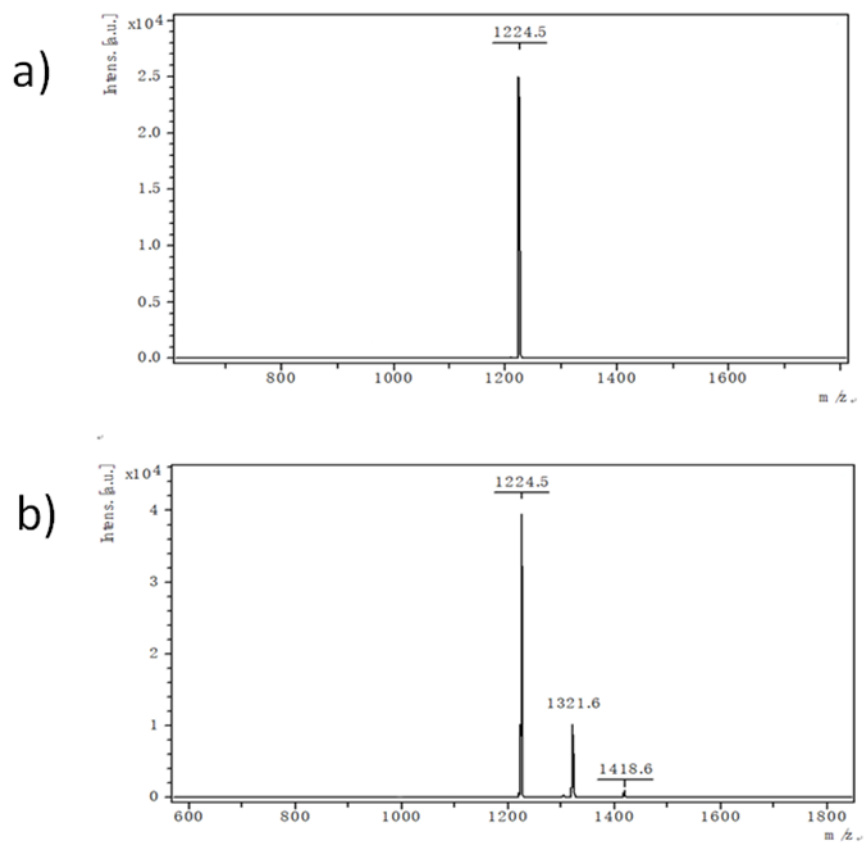

**Figure S1** (a) The mass spectrometry (MS) of Spiro-OMeTAD and (b) Spiro-OMeTAD with NBS.

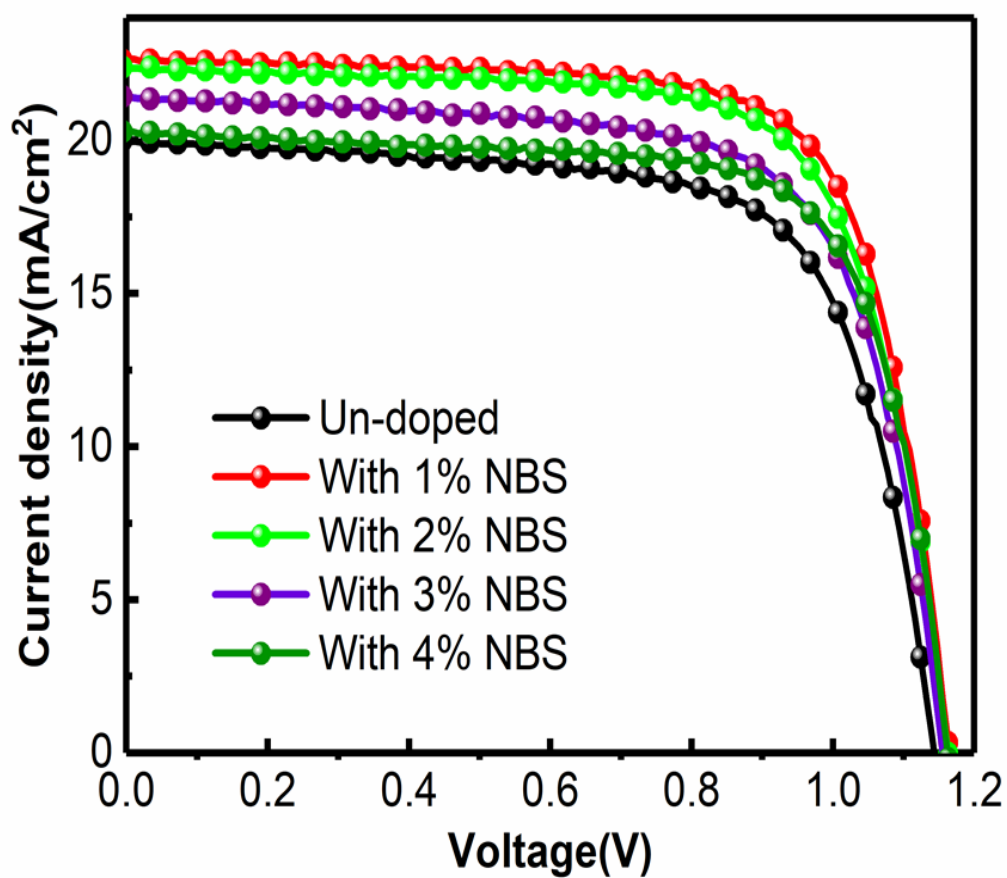

Figure S2 J-V curves of the devices with different concentration of NBS

Table S1 Photovoltaic characteristics statistics based on different Spiro-OMeTAD HTM.

| NBS concentration | $V_{OC}$ (V) | $J_{SC}$ (mA/cm <sup>2</sup> ) | FF (%) | PCE (%) |
|-------------------|--------------|--------------------------------|--------|---------|
| 0                 | 1.14         | 20.02                          | 69.58  | 16.12   |
| 1%                | 1.16         | 22.63                          | 73.01  | 19.24   |
| 2%                | 1.16         | 22.35                          | 71.69  | 18.63   |
| 3%                | 1.14         | 21.90                          | 71.59  | 17.83   |
| 4%                | 1.14         | 20.28                          | 70.68  | 16.54   |

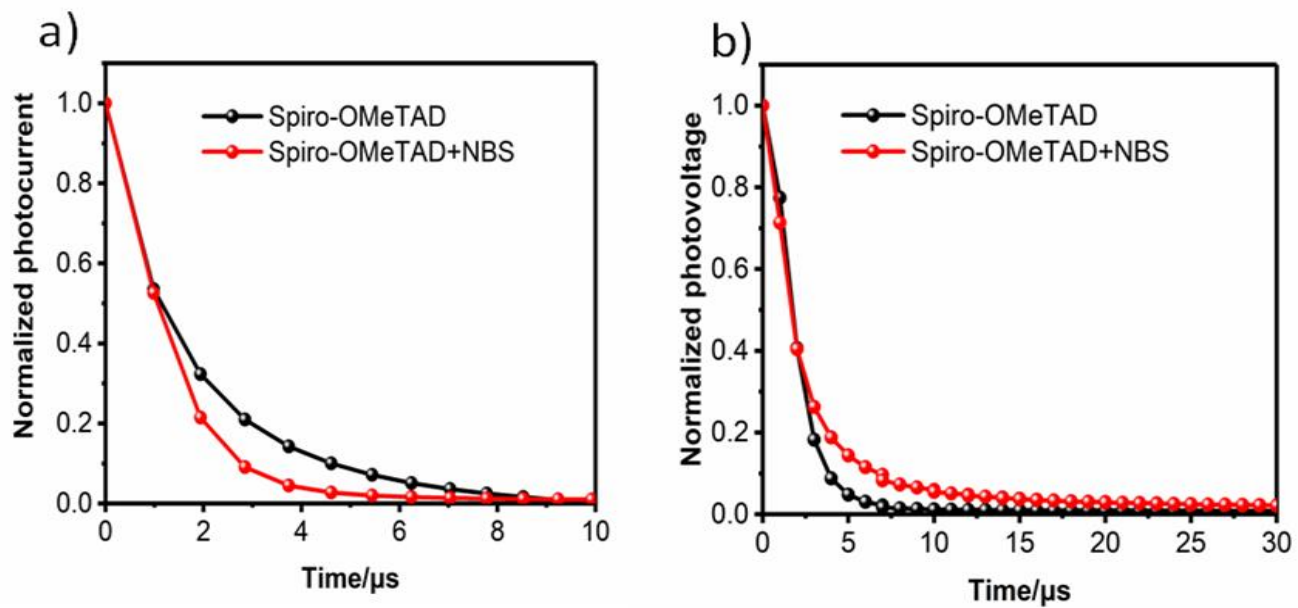

**Figure S3** (a) Transient photocurrent (TPC) and (b) Transient photovoltage (TPV) of devices.

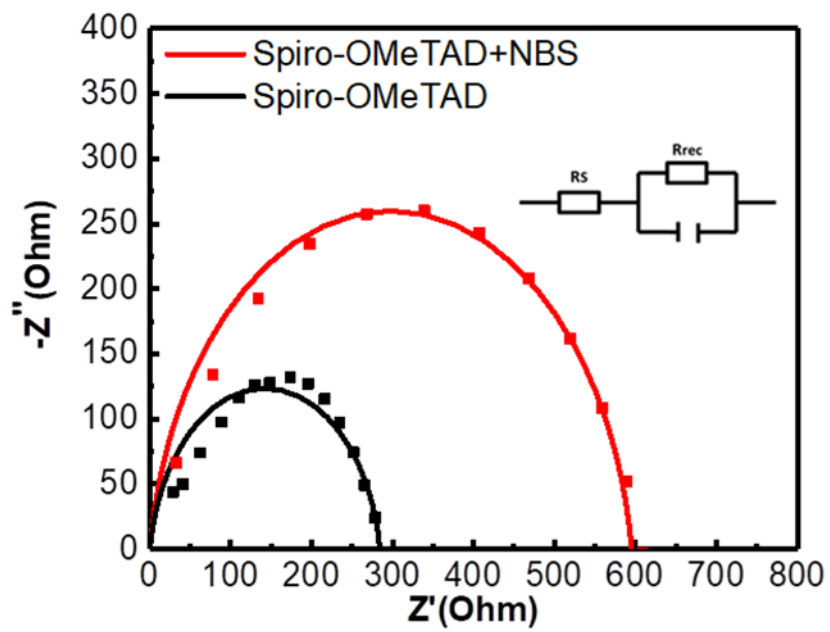

**Figure S4** Nyquist plots acquired from devices using Spiro-OMeTAD and Spiro-OMeTAD-NBS as HTM, respectively.

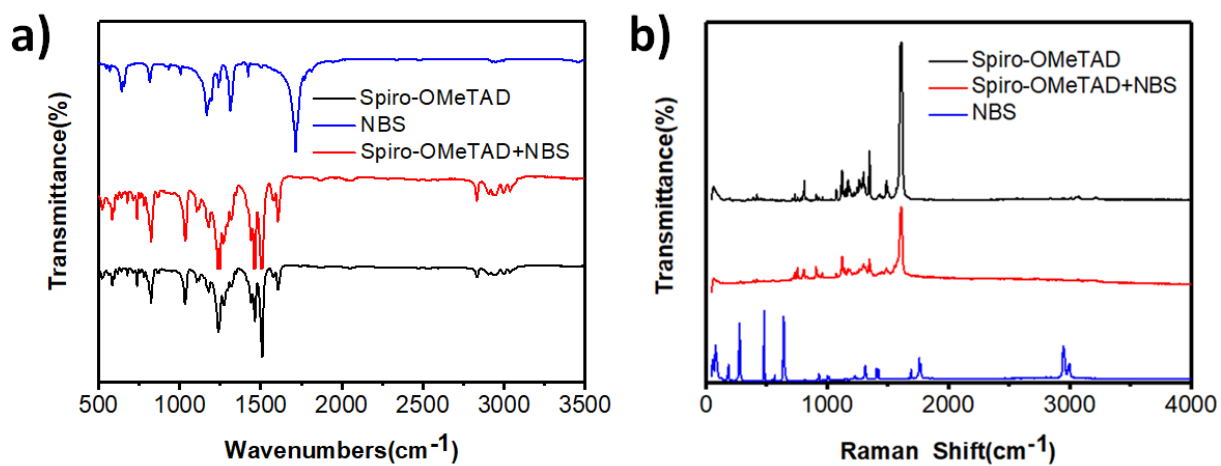

**Figure S5** (a) and (b) The FT-IR and Raman spectroscopy of NBS, Spiro-OMeTAD and Spiro-OMeTAD doped NBS.
